# Supplementary material for: Cluster Randomized Trial: Sun Protection Intervention ‘Clever in Sun and Shade for Preschools’—Effectiveness and Dissemination
Source: Children (Basel). 2021 Jul 28;8(8):651. doi: 10.3390/children8080651 (PMC8391804; doi:10.3390/children8080651)
Supplement: Supplementary file 1 [file children-08-00651-s001.zip › children-1280907-supplementary.pdf]

# Checkliste „Clever in Sonne und Schatten“ Unsere Sonnenschutz-Strategie

**Sonnenschutz  
Clown**

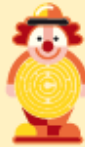

| Istzustand     |           |                      | Ziele                 |                             | Umsetzung                |
|----------------|-----------|----------------------|-----------------------|-----------------------------|--------------------------|
| Das machen wir | Teilweise | Das machen wir nicht | Das wollen wir machen | Das wollen wir nicht machen | Das wollen wir so machen |

## 1. SONNEN-CHECK: Auf die Stärke der Sonne achten und Sonnenpausen einlegen

|  |                                                                                                                                                                                                                                                                                                                         |                                     |                                     |                                     |                                     |                                     |
|--|-------------------------------------------------------------------------------------------------------------------------------------------------------------------------------------------------------------------------------------------------------------------------------------------------------------------------|-------------------------------------|-------------------------------------|-------------------------------------|-------------------------------------|-------------------------------------|
|  | Sonnenschutz von April bis September: Sonnenschutz wird von Anfang April bis Ende September beachtet                                                                                                                                                                                                                    | <input checked="" type="checkbox"/> |
|  | Sonnenpause zwischen 11 Uhr und 15 Uhr: Von April bis September zwischen 11 und 15 Uhr im Haus oder im Schatten aufhalten                                                                                                                                                                                               | <input checked="" type="checkbox"/> |
|  | Schatten suchen: Beschattete Spielbereiche bevorzugen und bei wandelndem Schatten eventuell Spielbereich wechseln                                                                                                                                                                                                       | <input checked="" type="checkbox"/> |
|  | Schatten in der Gartengestaltung einplanen: Bänke und Spielzeug an vorhandenen Schattenplätzen aufbauen, Schattenbäume oder Weidenrutenhütten pflanzen, Sonnensegel spannen, Tüls oder Buden mit den Kindern bauen                                                                                                      | <input checked="" type="checkbox"/> |
|  | Schatten finanzieren: Bei Bedarf Finanzierungsmöglichkeiten schaffen: Haushaltsmittel, Spendenaufruf, Anfrage beim Träger, ...                                                                                                                                                                                          | <input checked="" type="checkbox"/> |
|  | UV-Index: Zur Abschätzung der Stärke der UV-Strahlung informiert sich das Team in uneindeutigen Situationen, z.B. im April oder bei Bewölkung, über den aktuellen UV-Index ( <a href="http://www.bfs.de/uv-prognose">www.bfs.de/uv-prognose</a> oder <a href="http://www.bfs.de/uv-aktuell">www.bfs.de/uv-aktuell</a> ) | <input checked="" type="checkbox"/> |

## 2. KLEIDUNGS-CHECK: Kleidung ist der beste Schutz

|  |                                                                                                                                                                                                                                                                               |                                     |                                     |                                     |                                     |                                     |
|--|-------------------------------------------------------------------------------------------------------------------------------------------------------------------------------------------------------------------------------------------------------------------------------|-------------------------------------|-------------------------------------|-------------------------------------|-------------------------------------|-------------------------------------|
|  | Schützende Kleidung: Kinder tragen luftige Oberteile, die mindestens die Schultern bedecken, und möglichst halblange Hosen oder Kleider                                                                                                                                       | <input checked="" type="checkbox"/> |
|  | Kopfbedeckung: Kinder tragen Hüte oder Mützen mit einer breiten Krone, die Gesicht, Ohren und Nacken schützen                                                                                                                                                                 | <input checked="" type="checkbox"/> |
|  | Sonnenbrille: Kinder dürfen bei Bereitstellung durch Eltern im Freien Sonnenbrillen mit UV-Schutz tragen                                                                                                                                                                      | <input checked="" type="checkbox"/> |
|  | Mitarbeit der Eltern: Eltern werden gebeten, T-Shirts, die die Schultern bedecken, und Kopfbedeckungen mitzugeben                                                                                                                                                             | <input checked="" type="checkbox"/> |
|  | Notfallliste: Schützende T-Shirts und Hüte als Ersatz anschaffen, z.B. „entwachsen“ Kleidungsstücke, kostenfreie „blaue Schirmmützen“ der Deutschen Krebshilfe (Bestellung unter Tel.: 0228/72990-0 oder <a href="mailto:scheider@krebshilfe.de">scheider@krebshilfe.de</a> ) | <input checked="" type="checkbox"/> |

## 3. SONNENCREME-CHECK: Alle unbedeckten Stellen eincremen

|  |                                                                                                                                                                                                                                                                               |                                     |                                     |                                     |                                     |                                     |
|--|-------------------------------------------------------------------------------------------------------------------------------------------------------------------------------------------------------------------------------------------------------------------------------|-------------------------------------|-------------------------------------|-------------------------------------|-------------------------------------|-------------------------------------|
|  | Geeignete Sonnenschutzcreme: Verwendung von Sonnencreme mit mindestens Lichtschutzfaktor 30, UVA- und UVB-Schutz sowie möglichst ohne Duft- und Konservierungsstoffe (bei Bedarf aktuelle Testergebnisse von Stiftung Warentest und Ökotest prüfen)                           | <input checked="" type="checkbox"/> |
|  | Ausreichend eincremen: Zwei gehäufte Teelöffel für das Gesicht, die Arme und den Nacken. Einen bis zwei gehäufte Esslöffel für den ganzen Körper eines Kindergartenkindes.                                                                                                    | <input checked="" type="checkbox"/> |
|  | Nachcremen: Kinder früh und nachmittags eincremen sowie nach dem Baden oder Duschen                                                                                                                                                                                           | <input checked="" type="checkbox"/> |
|  | Sonnencreme bereitstellen: Jedes Kind bringt eine eigene Creme mit oder es gibt eine einheitliche Creme, welche durch Geldbeiträge der Eltern, Haushaltsmittel der Kita oder einen Förderverein finanziert wird. Ausnahmen bei Unverträglichkeiten oder Allergien ermöglichen | <input checked="" type="checkbox"/> |
|  | Elternverständnis: Bei Bedarf per Brief oder Aushang Einverständnis zum Eincremen der Kinder einholen                                                                                                                                                                         | <input checked="" type="checkbox"/> |
|  | Unterstützung der Eltern: Eltern bitten, ihre Kinder am Morgen einzucremen und bei Bedarf ausreichend Sonnencreme mitzugeben                                                                                                                                                  | <input checked="" type="checkbox"/> |
|  | Notfallliste: Vorrat an Sonnencreme anlegen für Kinder, die keine eigene Sonnencreme haben                                                                                                                                                                                    | <input checked="" type="checkbox"/> |

## 4. BILDUNGS-CHECK: Sonnenschutz zum Thema machen und mit gutem Beispiel vorangehen

|  |                                                                                                                                         |                                     |                                     |                                     |                                     |                                     |
|--|-----------------------------------------------------------------------------------------------------------------------------------------|-------------------------------------|-------------------------------------|-------------------------------------|-------------------------------------|-------------------------------------|
|  | Kinder: Sonnenschutz wird interaktiv behandelt (z.B. Bilder malen, Lieder singen, Schatten suchen)                                      | <input checked="" type="checkbox"/> |
|  | Kita-Team: Erzieherinnen und Erzieher wissen um die Bedeutung des Sonnenschutzes und besprechen Maßnahmen bereits im April jeden Jahres | <input checked="" type="checkbox"/> |
|  | Eltern: Eltern werden über Elternbriefe oder einen Aushang über die Sonnenschutz-Strategie informiert und um Unterstützung gebeten      | <input checked="" type="checkbox"/> |
|  | Vorbild sein: Erzieherinnen und Erzieher tragen z.B. schützende Hüte                                                                    | <input checked="" type="checkbox"/> |

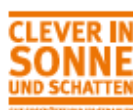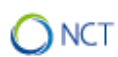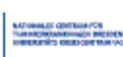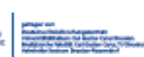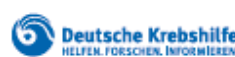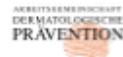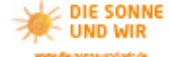

Figure S1. CLEVER-checklist for the development of the institutions' individual sun protection strategy

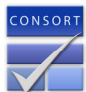

Table S1 CONSORT 2010 checklist of information to include when reporting a randomised trial\*

| Section/Topic                    | Item No | Checklist item                                                                                                                                                                              | Reported on page No |
|----------------------------------|---------|---------------------------------------------------------------------------------------------------------------------------------------------------------------------------------------------|---------------------|
| <b>Title and abstract</b>        |         |                                                                                                                                                                                             |                     |
|                                  | 1a      | Identification as a randomised trial in the title                                                                                                                                           | p. 1                |
|                                  | 1b      | Structured summary of trial design, methods, results, and conclusions (for specific guidance see CONSORT for abstracts)                                                                     | p. 1                |
| <b>Introduction</b>              |         |                                                                                                                                                                                             |                     |
| Background and objectives        | 2a      | Scientific background and explanation of rationale                                                                                                                                          | pp. 1-4             |
|                                  | 2b      | Specific objectives or hypotheses                                                                                                                                                           | p. 4                |
| <b>Methods</b>                   |         |                                                                                                                                                                                             |                     |
| Trial design                     | 3a      | Description of trial design (such as parallel, factorial) including allocation ratio                                                                                                        | p. 4                |
|                                  | 3b      | Important changes to methods after trial commencement (such as eligibility criteria), with reasons                                                                                          | n.a.                |
| Participants                     | 4a      | Eligibility criteria for participants                                                                                                                                                       | p. 4                |
|                                  | 4b      | Settings and locations where the data were collected                                                                                                                                        | p. 4                |
| Interventions                    | 5       | The interventions for each group with sufficient details to allow replication, including how and when they were actually administered                                                       | pp. 4-7             |
| Outcomes                         | 6a      | Completely defined pre-specified primary and secondary outcome measures, including how and when they were assessed                                                                          | pp. 7-8             |
|                                  | 6b      | Any changes to trial outcomes after the trial commenced, with reasons                                                                                                                       | n.a.                |
| Sample size                      | 7a      | How sample size was determined                                                                                                                                                              | pp. 8-9             |
|                                  | 7b      | When applicable, explanation of any interim analyses and stopping guidelines                                                                                                                | n.a.                |
| Randomisation:                   |         |                                                                                                                                                                                             |                     |
| Sequence generation              | 8a      | Method used to generate the random allocation sequence                                                                                                                                      | p. 9                |
|                                  | 8b      | Type of randomisation; details of any restriction (such as blocking and block size)                                                                                                         | p. 9                |
| Allocation concealment mechanism | 9       | Mechanism used to implement the random allocation sequence (such as sequentially numbered containers), describing any steps taken to conceal the sequence until interventions were assigned | p. 9                |
| Implementation                   | 10      | Who generated the random allocation sequence, who enrolled participants, and who assigned participants to interventions                                                                     | p. 9                |
| Blinding                         | 11a     | If done, who was blinded after assignment to interventions (for example, participants, care providers, those assessing outcomes) and how                                                    | p. 9                |

|                                                      |     |                                                                                                                                                   |            |
|------------------------------------------------------|-----|---------------------------------------------------------------------------------------------------------------------------------------------------|------------|
| Statistical methods                                  | 11b | If relevant, description of the similarity of interventions                                                                                       | n.a.       |
|                                                      | 12a | Statistical methods used to compare groups for primary and secondary outcomes                                                                     | p. 9       |
|                                                      | 12b | Methods for additional analyses, such as subgroup analyses and adjusted analyses                                                                  | p. 9       |
| <b>Results</b>                                       |     |                                                                                                                                                   |            |
| Participant flow (a diagram is strongly recommended) | 13a | For each group, the numbers of participants who were randomly assigned, received intended treatment, and were analysed for the primary outcome    | pp. 9-10   |
| Recruitment                                          | 13b | For each group, losses and exclusions after randomisation, together with reasons                                                                  | pp. 9-10   |
|                                                      | 14a | Dates defining the periods of recruitment and follow-up                                                                                           | p. 10      |
| Baseline data                                        | 14b | Why the trial ended or was stopped                                                                                                                | n.a.       |
|                                                      | 15  | A table showing baseline demographic and clinical characteristics for each group                                                                  | p. 11      |
| Numbers analysed                                     | 16  | For each group, number of participants (denominator) included in each analysis and whether the analysis was by original assigned groups           | p. 12      |
| Outcomes and estimation                              | 17a | For each primary and secondary outcome, results for each group, and the estimated effect size and its precision (such as 95% confidence interval) | p. 12      |
|                                                      | 17b | For binary outcomes, presentation of both absolute and relative effect sizes is recommended                                                       | n.a.       |
| Ancillary analyses                                   | 18  | Results of any other analyses performed, including subgroup analyses and adjusted analyses, distinguishing pre-specified from exploratory         | pp. 12-13  |
| Harms                                                | 19  | All important harms or unintended effects in each group (for specific guidance see CONSORT for harms)                                             | p. 11      |
| <b>Discussion</b>                                    |     |                                                                                                                                                   |            |
| Limitations                                          | 20  | Trial limitations, addressing sources of potential bias, imprecision, and, if relevant, multiplicity of analyses                                  | p. 20      |
| Generalisability                                     | 21  | Generalisability (external validity, applicability) of the trial findings                                                                         | pp. 17-19  |
| Interpretation                                       | 22  | Interpretation consistent with results, balancing benefits and harms, and considering other relevant evidence                                     | pp. 17-19  |
| <b>Other information</b>                             |     |                                                                                                                                                   |            |
| Registration                                         | 23  | Registration number and name of trial registry                                                                                                    | p. 1, p. 4 |
| Protocol                                             | 24  | Where the full trial protocol can be accessed, if available                                                                                       | n.a.       |
| Funding                                              | 25  | Sources of funding and other support (such as supply of drugs), role of funders                                                                   | p. 19      |

\*We strongly recommend reading this statement in conjunction with the CONSORT 2010 Explanation and Elaboration for important clarifications on all the items. If relevant, we also recommend reading CONSORT extensions for cluster randomised trials, non-inferiority and equivalence trials, non-pharmacological treatments, herbal interventions, and pragmatic trials. Additional extensions are forthcoming: for those and for up to date references relevant to this checklist, see [www.consort-statement.org](http://www.consort-statement.org).
